# Supplementary material for: The Role of Food Addiction and Lifetime Substance Use on Eating Disorder Treatment Outcomes
Source: MDPI journal article supplement (doi:10.3390/nu15132919), 2023-06-27
Supplement: s1 [file s1]

Supplementary Materials

# The Role of Food Addiction and Lifetime Substance Use on Eating Disorder Treatment Outcomes

Romina Miranda-Olivos, Zaida Agüera, Roser Granero, Susana Jiménez-Murcia, Montserrat Puig-Llobet, Maria Teresa Lluch-Canut, Ashley N. Gearhardt and Fernando Fernández-Aranda

**Table S1.** Descriptive of the sample based on the ED types.

|                          |                      | AN<br>n = 32 (10.6%) |       | BN<br>n = 132 (43.6%) |       | BED<br>n = 67 (22.1%) |       | OSFED<br>n = 72 (23.7%) |       | p        |
|--------------------------|----------------------|----------------------|-------|-----------------------|-------|-----------------------|-------|-------------------------|-------|----------|
|                          |                      | n                    | %     | n                     | %     | n                     | %     | n                       | %     |          |
| Gender                   | Women                | 30                   | 93.8% | 120                   | 90.9% | 59                    | 88.1% | 68                      | 94.4% | 0.558    |
|                          | Men                  | 2                    | 6.3%  | 12                    | 9.1%  | 8                     | 11.9% | 4                       | 5.6%  |          |
| Marital status           | Single               | 25                   | 78.1% | 86                    | 65.2% | 31                    | 46.3% | 59                      | 81.9% | 0.001*   |
|                          | Married - partner    | 5                    | 15.6% | 28                    | 21.2% | 23                    | 34.3% | 9                       | 12.5% |          |
|                          | Divorced - separated | 2                    | 6.3%  | 18                    | 13.6% | 13                    | 19.4% | 4                       | 5.6%  |          |
| Education                | Primary              | 15                   | 46.9% | 48                    | 36.4% | 26                    | 38.8% | 25                      | 34.7% | 0.538    |
|                          | Secondary            | 14                   | 43.8% | 63                    | 47.7% | 26                    | 38.8% | 37                      | 51.4% |          |
|                          | University           | 3                    | 9.4%  | 21                    | 15.9% | 15                    | 22.4% | 10                      | 13.9% |          |
| Employment               | Unemployed           | 6                    | 18.8% | 23                    | 17.4% | 15                    | 22.4% | 16                      | 22.2% | 0.021*   |
|                          | Student              | 13                   | 40.6% | 31                    | 23.5% | 7                     | 10.4% | 22                      | 30.6% |          |
|                          | Employed             | 13                   | 40.6% | 78                    | 59.1% | 45                    | 67.2% | 34                      | 47.2% |          |
|                          |                      | Mean                 | SD    | Mean                  | SD    | Mean                  | SD    | Mean                    | SD    | p        |
| Age (years-old)          |                      | 28.19                | 11.42 | 31.39                 | 10.98 | 40.79                 | 12.81 | 28.24                   | 10.65 | < 0.001* |
| Onset ED (years-old)     |                      | 17.47                | 5.74  | 19.59                 | 8.94  | 26.03                 | 12.28 | 19.28                   | 8.70  | < 0.001* |
| Duration ED (years)      |                      | 10.53                | 10.04 | 12.57                 | 9.45  | 15.18                 | 11.47 | 9.11                    | 8.13  | 0.002*   |
| BMI (kg/m <sup>2</sup> ) |                      | 16.38                | 1.39  | 26.80                 | 6.85  | 39.44                 | 8.79  | 22.81                   | 4.47  | < 0.001* |
|                          |                      | n                    | %     | n                     | %     | n                     | %     | n                       | %     | p        |
| FA                       | Negative             | 14                   | 43.8% | 8                     | 6.1%  | 13                    | 19.4% | 27                      | 37.5% | < 0.001* |
|                          | Positive             | 18                   | 56.3% | 124                   | 93.9% | 54                    | 80.6% | 45                      | 62.5% |          |
| SU                       | Absent               | 25                   | 78.1% | 77                    | 58.3% | 49                    | 73.1% | 58                      | 80.6% | 0.004*   |
|                          | Present              | 7                    | 21.9% | 55                    | 41.7% | 18                    | 26.9% | 14                      | 19.4% |          |
| Group                    | FA− & SU−            | 11                   | 34.4% | 7                     | 5.3%  | 12                    | 17.9% | 26                      | 36.1% | < 0.001* |
|                          | FA+ or SU+           | 17                   | 53.1% | 71                    | 53.8% | 38                    | 56.7% | 33                      | 45.8% |          |
|                          | FA+ & SU+            | 4                    | 12.5% | 54                    | 40.9% | 17                    | 25.4% | 13                      | 18.1% |          |

Note. AN: anorexia nervosa. BN: bulimia nervosa. BED: binge eating disorder. ED: eating disorder. OSFED: other specified feeding or eating disorder.

FA: current food addiction. FA−: food addiction negative screening score. FA+: food addiction positive screening score.

SU: lifetime substance use. SU−: lifetime substances use absent. SU+: lifetime substances use present.

Table S2. Distribution of the measures in the study.

| Therapy outcome             | FA– & SU–     |       |               |       |               |                         | FA+ or SU+    |       |               |       |               |          | FA+ & SU+     |       |               |       |          |          |
|-----------------------------|---------------|-------|---------------|-------|---------------|-------------------------|---------------|-------|---------------|-------|---------------|----------|---------------|-------|---------------|-------|----------|----------|
|                             | Good          |       | Poor          |       |               |                         | Good          |       | Poor          |       |               |          | Good          |       | Poor          |       |          |          |
|                             | <i>n</i> = 26 |       | <i>n</i> = 30 |       |               |                         | <i>n</i> = 87 |       | <i>n</i> = 72 |       |               |          | <i>n</i> = 41 |       | <i>n</i> = 47 |       |          |          |
|                             | Mean          | SD    | Mean          | SD    | <i>p</i>      | <i>d</i>                | Mean          | SD    | Mean          | SD    | <i>p</i>      | <i>d</i> | Mean          | SD    | Mean          | SD    | <i>p</i> | <i>d</i> |
| <i>ED severity (EDI-2)</i>  |               |       |               |       |               |                         |               |       |               |       |               |          |               |       |               |       |          |          |
| Drive thinness              | 12.19         | 5.93  | 9.83          | 6.73  | 0.173         | 0.37                    | 15.07         | 4.80  | 15.22         | 4.93  | 0.843         | 0.03     | 14.71         | 5.43  | 16.43         | 4.65  | 0.114    | 0.34     |
| Body dissatisfaction        | 16.69         | 6.92  | 11.87         | 9.13  | <b>0.032*</b> | <b>0.60<sup>+</sup></b> | 18.44         | 7.08  | 18.10         | 7.04  | 0.763         | 0.05     | 18.51         | 7.25  | 19.04         | 6.73  | 0.723    | 0.08     |
| Interoc. awareness          | 9.50          | 6.74  | 8.33          | 8.29  | 0.570         | 0.15                    | 12.70         | 6.61  | 12.86         | 6.82  | 0.881         | 0.02     | 14.44         | 6.66  | 13.51         | 7.18  | 0.533    | 0.13     |
| Bulimia                     | 3.42          | 4.22  | 2.93          | 4.13  | 0.663         | 0.12                    | 8.90          | 5.17  | 8.78          | 5.00  | 0.884         | 0.02     | 9.44          | 4.58  | 9.57          | 4.65  | 0.891    | 0.03     |
| Interper. distrust          | 5.46          | 5.27  | 5.97          | 4.99  | 0.714         | 0.10                    | 5.61          | 4.85  | 6.58          | 4.89  | 0.211         | 0.20     | 6.15          | 5.43  | 6.70          | 4.52  | 0.601    | 0.11     |
| Ineffectiveness             | 9.54          | 7.36  | 6.87          | 6.27  | 0.148         | 0.39                    | 11.21         | 7.29  | 13.54         | 7.24  | <b>0.045*</b> | 0.32     | 11.71         | 7.10  | 13.06         | 7.24  | 0.379    | 0.19     |
| Maturity fears              | 7.92          | 4.80  | 6.43          | 4.52  | 0.237         | 0.32                    | 7.69          | 5.22  | 9.11          | 5.59  | 0.100         | 0.26     | 8.51          | 5.96  | 9.26          | 6.29  | 0.573    | 0.12     |
| Perfectionism               | 5.38          | 4.48  | 5.70          | 4.50  | 0.794         | 0.07                    | 5.71          | 4.53  | 6.47          | 4.16  | 0.276         | 0.17     | 5.68          | 4.41  | 6.09          | 4.60  | 0.678    | 0.09     |
| Impulse regulation          | 4.31          | 4.86  | 5.47          | 6.77  | 0.471         | 0.20                    | 5.48          | 4.83  | 7.42          | 5.22  | <b>0.017*</b> | 0.38     | 8.02          | 7.00  | 8.43          | 7.11  | 0.791    | 0.06     |
| Ascetism                    | 5.31          | 3.45  | 5.47          | 4.22  | 0.879         | 0.04                    | 7.67          | 3.78  | 7.61          | 3.43  | 0.923         | 0.02     | 7.49          | 3.91  | 8.23          | 4.36  | 0.403    | 0.18     |
| Social insecurity           | 7.00          | 5.61  | 5.83          | 5.48  | 0.435         | 0.21                    | 7.33          | 5.08  | 8.74          | 4.60  | 0.072         | 0.29     | 7.95          | 4.71  | 8.94          | 5.23  | 0.358    | 0.20     |
| Total score                 | 86.73         | 39.98 | 74.70         | 47.60 | 0.315         | 0.27                    | 105.80        | 36.48 | 114.43        | 34.43 | 0.130         | 0.24     | 112.61        | 38.73 | 119.26        | 39.43 | 0.429    | 0.17     |
| <i>Psychop. (SCL-90R)</i>   |               |       |               |       |               |                         |               |       |               |       |               |          |               |       |               |       |          |          |
| Somatization                | 1.54          | 0.83  | 1.25          | 1.11  | 0.281         | 0.29                    | 1.92          | 0.79  | 2.10          | 0.83  | 0.166         | 0.22     | 1.91          | 0.91  | 2.03          | 0.90  | 0.527    | 0.14     |
| Obsessive-comp.             | 1.68          | 0.94  | 1.38          | 1.01  | 0.256         | 0.31                    | 2.00          | 0.80  | 2.21          | 0.74  | 0.083         | 0.28     | 2.01          | 0.76  | 2.10          | 0.74  | 0.585    | 0.12     |
| Interp. sensitivity         | 1.73          | 0.92  | 1.50          | 1.14  | 0.413         | 0.22                    | 1.97          | 0.84  | 2.25          | 0.74  | <b>0.026*</b> | 0.36     | 2.17          | 0.91  | 2.13          | 0.85  | 0.842    | 0.04     |
| Depressive                  | 1.88          | 0.87  | 1.56          | 1.06  | 0.232         | 0.33                    | 2.28          | 0.81  | 2.54          | 0.74  | <b>0.038*</b> | 0.33     | 2.44          | 0.90  | 2.51          | 0.77  | 0.724    | 0.08     |
| Anxiety                     | 1.20          | 0.73  | 1.19          | 1.01  | 0.978         | 0.01                    | 1.73          | 0.79  | 1.91          | 0.76  | 0.148         | 0.23     | 1.76          | 0.92  | 1.99          | 0.90  | 0.246    | 0.25     |
| Hostility                   | 0.59          | 0.61  | 0.93          | 1.05  | 0.149         | 0.40                    | 1.28          | 0.83  | 1.52          | 0.82  | 0.065         | 0.30     | 1.57          | 0.98  | 1.57          | 1.03  | 0.980    | 0.01     |
| Phobic anxiety              | 0.74          | 0.84  | 0.68          | 0.88  | 0.796         | 0.07                    | 1.00          | 0.86  | 1.20          | 0.91  | 0.143         | 0.23     | 1.14          | 0.94  | 1.32          | 1.03  | 0.388    | 0.19     |
| Paranoia                    | 1.06          | 0.70  | 1.16          | 0.87  | 0.648         | 0.12                    | 1.46          | 0.81  | 1.56          | 0.79  | 0.412         | 0.13     | 1.56          | 0.81  | 1.50          | 0.94  | 0.761    | 0.07     |
| Psychotic                   | 1.10          | 0.79  | 0.77          | 0.72  | 0.108         | 0.44                    | 1.33          | 0.72  | 1.58          | 0.69  | <b>0.034*</b> | 0.34     | 1.46          | 0.77  | 1.53          | 0.75  | 0.693    | 0.08     |
| GSI                         | 1.40          | 0.68  | 1.22          | 0.87  | 0.402         | 0.23                    | 1.78          | 0.62  | 1.99          | 0.57  | <b>0.025*</b> | 0.36     | 1.88          | 0.73  | 1.97          | 0.72  | 0.542    | 0.13     |
| PST                         | 56.62         | 16.34 | 47.60         | 23.57 | 0.107         | 0.44                    | 66.85         | 15.15 | 69.88         | 11.83 | 0.169         | 0.22     | 66.20         | 15.91 | 69.15         | 13.98 | 0.356    | 0.20     |
| PSDI                        | 2.11          | 0.51  | 2.09          | 0.67  | 0.921         | 0.03                    | 2.33          | 0.47  | 2.53          | 0.48  | <b>0.009*</b> | 0.42     | 2.46          | 0.56  | 2.49          | 0.53  | 0.774    | 0.06     |
| <i>Impulsivity (UPPS-P)</i> |               |       |               |       |               |                         |               |       |               |       |               |          |               |       |               |       |          |          |
| Lack premeditation          | 22.15         | 5.37  | 20.90         | 4.59  | 0.350         | 0.25                    | 23.57         | 6.32  | 23.30         | 6.14  | 0.780         | 0.04     | 25.05         | 6.45  | 25.43         | 6.46  | 0.785    | 0.06     |
| Lack perseverance           | 22.19         | 5.22  | 18.83         | 4.68  | <b>0.014*</b> | <b>0.68<sup>+</sup></b> | 23.36         | 5.53  | 24.06         | 4.83  | 0.404         | 0.13     | 25.56         | 5.84  | 24.96         | 6.91  | 0.662    | 0.09     |
| Sensation seeking           | 24.96         | 8.32  | 27.97         | 8.45  | 0.187         | 0.36                    | 25.43         | 8.64  | 25.51         | 7.95  | 0.951         | 0.01     | 26.41         | 7.94  | 28.72         | 9.47  | 0.223    | 0.26     |
| Positive urgency            | 24.81         | 8.05  | 25.93         | 9.70  | 0.642         | 0.13                    | 28.61         | 8.97  | 28.83         | 8.38  | 0.874         | 0.03     | 30.17         | 9.77  | 33.13         | 11.20 | 0.194    | 0.28     |

|                            |        |       |        |       |                          |                         |        |       |        |       |                          |      |        |       |        |       |       |      |
|----------------------------|--------|-------|--------|-------|--------------------------|-------------------------|--------|-------|--------|-------|--------------------------|------|--------|-------|--------|-------|-------|------|
| Negative urgency           | 29.42  | 7.01  | 27.70  | 7.44  | 0.379                    | 0.24                    | 33.99  | 6.71  | 35.87  | 5.29  | 0.056                    | 0.31 | 36.76  | 6.48  | 35.66  | 6.29  | 0.423 | 0.17 |
| Total                      | 123.54 | 21.98 | 121.33 | 23.30 | 0.718                    | 0.10                    | 134.94 | 21.75 | 137.55 | 21.43 | 0.452                    | 0.12 | 143.95 | 19.86 | 147.87 | 28.03 | 0.457 | 0.16 |
| <i>Personality (TCI-R)</i> |        |       |        |       |                          |                         |        |       |        |       |                          |      |        |       |        |       |       |      |
| Novelty seeking            | 92.28  | 12.13 | 97.53  | 14.04 | 0.148                    | 0.40                    | 99.02  | 17.87 | 99.27  | 15.13 | 0.927                    | 0.01 | 104.78 | 19.37 | 107.02 | 15.64 | 0.550 | 0.13 |
| Harm avoidance             | 113.52 | 17.94 | 103.67 | 21.01 | 0.070                    | <b>0.50<sup>†</sup></b> | 116.59 | 21.17 | 124.24 | 16.93 | <b>0.015<sup>*</sup></b> | 0.40 | 119.76 | 18.78 | 122.51 | 18.57 | 0.492 | 0.15 |
| Reward dependence          | 99.20  | 18.63 | 101.27 | 18.52 | 0.683                    | 0.11                    | 101.11 | 15.98 | 98.20  | 14.25 | 0.233                    | 0.19 | 100.59 | 18.46 | 98.53  | 16.58 | 0.584 | 0.12 |
| Persistence                | 103.72 | 19.95 | 117.50 | 17.72 | <b>0.009<sup>*</sup></b> | <b>0.73<sup>†</sup></b> | 109.64 | 21.66 | 105.61 | 19.09 | 0.221                    | 0.20 | 103.90 | 21.87 | 105.32 | 19.83 | 0.751 | 0.07 |
| Self-directedness          | 126.84 | 17.78 | 131.50 | 17.79 | 0.338                    | 0.26                    | 115.61 | 18.79 | 111.37 | 19.61 | 0.168                    | 0.22 | 112.07 | 18.08 | 107.26 | 19.09 | 0.229 | 0.26 |
| Cooperativeness            | 133.76 | 16.57 | 136.83 | 17.25 | 0.506                    | 0.18                    | 136.57 | 16.77 | 132.86 | 16.02 | 0.159                    | 0.23 | 130.59 | 16.52 | 131.98 | 16.89 | 0.697 | 0.08 |
| Self-transcendence         | 65.28  | 22.46 | 64.87  | 17.28 | 0.939                    | 0.02                    | 67.85  | 16.90 | 64.46  | 13.28 | 0.171                    | 0.22 | 66.68  | 13.68 | 66.53  | 14.70 | 0.961 | 0.01 |

Note. FA−: food addiction negative screening score. FA+: food addiction positive screening score.

SU−: substances use absent. SU+: substances use present.

\* Bold: significant parameter. † Bold: effect size into the range mild-moderate to large-high.

**Table S3.** Comparison between the groups with poor outcome.

|                                  | FA– & SU–     |           | FA+ or SU+    |           | FA+ & SU+     |           | FA– & SU–            |                         | FA– & SU–           |                         | FA+ or SU+          |                         |
|----------------------------------|---------------|-----------|---------------|-----------|---------------|-----------|----------------------|-------------------------|---------------------|-------------------------|---------------------|-------------------------|
|                                  | <i>n</i> = 30 |           | <i>n</i> = 72 |           | <i>n</i> = 47 |           | <i>vs</i> FA+ or SU+ |                         | <i>vs</i> FA+ & SU+ |                         | <i>vs</i> FA+ & SU+ |                         |
|                                  | <i>Mean</i>   | <i>SD</i> | <i>Mean</i>   | <i>SD</i> | <i>Mean</i>   | <i>SD</i> | <i>p</i>             | <i>d</i>                | <i>p</i>            | <i>d</i>                | <i>p</i>            | <i>d</i>                |
| <i>ED severity (EDI-2)</i>       |               |           |               |           |               |           |                      |                         |                     |                         |                     |                         |
| Drive for thinness               | 9.83          | 6.73      | 15.22         | 4.93      | 16.43         | 4.65      | <b>0.001*</b>        | <b>0.91<sup>†</sup></b> | <b>0.001*</b>       | <b>1.14<sup>†</sup></b> | 0.224               | 0.25                    |
| Body dissatisfaction             | 11.87         | 9.13      | 18.10         | 7.04      | 19.04         | 6.73      | <b>0.001*</b>        | <b>0.76<sup>†</sup></b> | <b>0.001*</b>       | <b>0.89<sup>†</sup></b> | 0.498               | 0.14                    |
| Interceptive awareness           | 8.33          | 8.29      | 12.86         | 6.82      | 13.51         | 7.18      | <b>0.005*</b>        | <b>0.60<sup>†</sup></b> | <b>0.003*</b>       | <b>0.67<sup>†</sup></b> | 0.633               | 0.09                    |
| Bulimia                          | 2.93          | 4.13      | 8.78          | 5.00      | 9.57          | 4.65      | <b>0.001*</b>        | <b>1.28<sup>†</sup></b> | <b>0.001*</b>       | <b>1.51<sup>†</sup></b> | 0.370               | 0.17                    |
| Interpersonal distrust           | 5.97          | 4.99      | 6.58          | 4.89      | 6.70          | 4.52      | 0.555                | 0.12                    | 0.513               | 0.15                    | 0.895               | 0.03                    |
| Ineffectiveness                  | 6.87          | 6.27      | 13.54         | 7.24      | 13.06         | 7.24      | <b>0.001*</b>        | <b>0.99<sup>†</sup></b> | <b>0.001*</b>       | <b>0.91<sup>†</sup></b> | 0.719               | 0.07                    |
| Maturity fears                   | 6.43          | 4.52      | 9.11          | 5.59      | 9.26          | 6.29      | <b>0.030*</b>        | <b>0.53<sup>†</sup></b> | <b>0.034*</b>       | <b>0.52<sup>†</sup></b> | 0.892               | 0.02                    |
| Perfectionism                    | 5.70          | 4.50      | 6.47          | 4.16      | 6.09          | 4.60      | 0.418                | 0.18                    | 0.707               | 0.08                    | 0.637               | 0.09                    |
| Impulse regulation               | 5.47          | 6.77      | 7.42          | 5.22      | 8.43          | 7.11      | 0.149                | 0.32                    | <b>0.043*</b>       | 0.43                    | 0.386               | 0.16                    |
| Ascetism                         | 5.47          | 4.22      | 7.61          | 3.43      | 8.23          | 4.36      | <b>0.013*</b>        | <b>0.56<sup>†</sup></b> | <b>0.003*</b>       | <b>0.64<sup>†</sup></b> | 0.396               | 0.16                    |
| Social insecurity                | 5.83          | 5.48      | 8.74          | 4.60      | 8.94          | 5.23      | <b>0.008*</b>        | <b>0.57<sup>†</sup></b> | <b>0.009*</b>       | <b>0.58<sup>†</sup></b> | 0.831               | 0.04                    |
| Total score                      | 74.70         | 47.60     | 114.43        | 34.43     | 119.26        | 39.43     | <b>0.001*</b>        | <b>0.96<sup>†</sup></b> | <b>0.001*</b>       | <b>1.02<sup>†</sup></b> | 0.510               | 0.13                    |
| <i>Psychopathology (SCL-90R)</i> |               |           |               |           |               |           |                      |                         |                     |                         |                     |                         |
| Somatization                     | 1.25          | 1.11      | 2.10          | 0.83      | 2.03          | 0.90      | <b>0.001*</b>        | <b>0.87<sup>†</sup></b> | <b>0.001*</b>       | <b>0.77<sup>†</sup></b> | 0.682               | 0.08                    |
| Obsessive-compulsive             | 1.38          | 1.01      | 2.21          | 0.74      | 2.10          | 0.74      | <b>0.001*</b>        | <b>0.94<sup>†</sup></b> | <b>0.001*</b>       | <b>0.81<sup>†</sup></b> | 0.464               | 0.15                    |
| Interpersonal sensitivity        | 1.50          | 1.14      | 2.25          | 0.74      | 2.13          | 0.85      | <b>0.001*</b>        | <b>0.79<sup>†</sup></b> | <b>0.002</b>        | <b>0.62<sup>†</sup></b> | 0.436               | 0.16                    |
| Depressive                       | 1.56          | 1.06      | 2.54          | 0.74      | 2.51          | 0.77      | <b>0.001*</b>        | <b>1.07<sup>†</sup></b> | <b>0.001*</b>       | <b>1.02<sup>†</sup></b> | 0.843               | 0.04                    |
| Anxiety                          | 1.19          | 1.01      | 1.91          | 0.76      | 1.99          | 0.90      | <b>0.001*</b>        | <b>0.80<sup>†</sup></b> | <b>0.001*</b>       | <b>0.83<sup>†</sup></b> | 0.624               | 0.10                    |
| Hostility                        | 0.93          | 1.05      | 1.52          | 0.82      | 1.57          | 1.03      | <b>0.005*</b>        | <b>0.62<sup>†</sup></b> | <b>0.004*</b>       | <b>0.61<sup>†</sup></b> | 0.761               | 0.06                    |
| Phobic anxiety                   | 0.68          | 0.88      | 1.20          | 0.91      | 1.32          | 1.03      | <b>0.011*</b>        | <b>0.59<sup>†</sup></b> | <b>0.004*</b>       | <b>0.68<sup>†</sup></b> | 0.506               | 0.12                    |
| Paranoia                         | 1.16          | 0.87      | 1.56          | 0.79      | 1.50          | 0.94      | <b>0.030*</b>        | <b>0.49<sup>†</sup></b> | 0.083               | 0.38                    | 0.713               | 0.07                    |
| Psychoticism                     | 0.77          | 0.72      | 1.58          | 0.69      | 1.53          | 0.75      | <b>0.001*</b>        | <b>1.15<sup>†</sup></b> | <b>0.001*</b>       | <b>1.03<sup>†</sup></b> | 0.725               | 0.07                    |
| GSI                              | 1.22          | 0.87      | 1.99          | 0.57      | 1.97          | 0.72      | <b>0.001*</b>        | <b>1.05<sup>†</sup></b> | <b>0.001*</b>       | <b>0.94<sup>†</sup></b> | 0.867               | 0.03                    |
| PST                              | 47.60         | 23.57     | 69.88         | 11.83     | 69.15         | 13.98     | <b>0.001*</b>        | <b>1.19<sup>†</sup></b> | <b>0.001*</b>       | <b>1.11<sup>†</sup></b> | 0.803               | 0.06                    |
| PSDI                             | 2.09          | 0.67      | 2.53          | 0.48      | 2.49          | 0.53      | <b>0.001*</b>        | <b>0.77<sup>†</sup></b> | <b>0.002*</b>       | <b>0.66<sup>†</sup></b> | 0.660               | 0.09                    |
| <i>Impulsivity (UPPS-P)</i>      |               |           |               |           |               |           |                      |                         |                     |                         |                     |                         |
| Lack premeditation               | 20.90         | 4.59      | 23.30         | 6.14      | 25.43         | 6.46      | 0.067                | 0.44                    | <b>0.001*</b>       | <b>0.81<sup>†</sup></b> | 0.060               | 0.34                    |
| Lack perseverance                | 18.83         | 4.68      | 24.06         | 4.83      | 24.96         | 6.91      | <b>0.001*</b>        | <b>1.10<sup>†</sup></b> | <b>0.001*</b>       | <b>1.04<sup>†</sup></b> | 0.389               | 0.15                    |
| Sensation seeking                | 27.97         | 8.45      | 25.51         | 7.95      | 28.72         | 9.47      | 0.189                | 0.30                    | 0.706               | 0.08                    | <b>0.048*</b>       | 0.37                    |
| Positive urgency                 | 25.93         | 9.70      | 28.83         | 8.38      | 33.13         | 11.20     | 0.169                | 0.32                    | <b>0.002</b>        | <b>0.69<sup>†</sup></b> | <b>0.019*</b>       | 0.43                    |
| Negative urgency                 | 27.70         | 7.44      | 35.87         | 5.29      | 35.66         | 6.29      | <b>0.001*</b>        | <b>1.27<sup>†</sup></b> | <b>0.001*</b>       | <b>1.16<sup>†</sup></b> | 0.852               | 0.04                    |
| Total UPPS-P                     | 121.33        | 23.30     | 137.55        | 21.43     | 147.87        | 28.03     | <b>0.002*</b>        | <b>0.72<sup>†</sup></b> | <b>0.001*</b>       | <b>1.03<sup>†</sup></b> | <b>0.024*</b>       | 0.41                    |
| <i>Personality (TCI-R)</i>       |               |           |               |           |               |           |                      |                         |                     |                         |                     |                         |
| Novelty seeking                  | 97.53         | 14.04     | 99.27         | 15.13     | 107.02        | 15.64     | 0.598                | 0.12                    | <b>0.008*</b>       | <b>0.64<sup>†</sup></b> | <b>0.007*</b>       | <b>0.50<sup>†</sup></b> |
| Harm avoidance                   | 103.67        | 21.01     | 124.24        | 16.93     | 122.51        | 18.57     | <b>0.001*</b>        | <b>1.08<sup>†</sup></b> | <b>0.001*</b>       | <b>0.95<sup>†</sup></b> | 0.617               | 0.10                    |
| Reward dependence                | 101.27        | 18.52     | 98.20         | 14.25     | 98.53         | 16.58     | 0.378                | 0.19                    | 0.464               | 0.16                    | 0.911               | 0.02                    |
| Persistence                      | 117.50        | 17.72     | 105.61        | 19.09     | 105.32        | 19.83     | <b>0.005*</b>        | <b>0.65<sup>†</sup></b> | <b>0.007*</b>       | <b>0.65<sup>†</sup></b> | 0.936               | 0.01                    |
| Self-directedness                | 131.50        | 17.79     | 111.37        | 19.61     | 107.26        | 19.09     | <b>0.001*</b>        | <b>1.08<sup>†</sup></b> | <b>0.001*</b>       | <b>1.31<sup>†</sup></b> | 0.254               | 0.21                    |
| Cooperativeness                  | 136.83        | 17.25     | 132.86        | 16.02     | 131.98        | 16.89     | 0.272                | 0.24                    | 0.211               | 0.28                    | 0.778               | 0.05                    |
| Self-transcendence               | 64.87         | 17.28     | 64.46         | 13.28     | 66.53         | 14.70     | 0.900                | 0.03                    | 0.626               | 0.10                    | 0.453               | 0.15                    |

Note. FA– & SU–: food addiction negative screening and substances use absent.

FA+ | SU+: food addiction positive screening or substances use present.

FA+ & SU+: food addiction positive screening and substances use present.

\* Bold: significant parameter. <sup>†</sup> Bold: effect size into the range mild-moderate to large-high.

**Table S4.** Comparison of the treatment outcomes in the study stratified by the ED subtype.

|       |              | FA− & SU− |       | FA+ or SU+ |       | FA+ & SU+ |       | <i>p</i> | CVI                      |
|-------|--------------|-----------|-------|------------|-------|-----------|-------|----------|--------------------------|
|       |              | <i>n</i>  | %     | <i>n</i>   | %     | <i>n</i>  | %     |          |                          |
| AN    | Poor outcome | 7         | 63.6% | 8          | 47.1% | 3         | 75.0% | 0.497    | <b>0.209<sup>†</sup></b> |
|       | Good outcome | 4         | 36.4% | 9          | 52.9% | 1         | 25.0% |          |                          |
| BN    | Poor outcome | 3         | 42.9% | 38         | 53.5% | 32        | 59.3% | 0.647    | 0.081                    |
|       | Good outcome | 4         | 57.1% | 33         | 46.5% | 22        | 40.7% |          |                          |
| BED   | Poor outcome | 5         | 41.7% | 12         | 31.6% | 5         | 29.4% | 0.763    | 0.090                    |
|       | Good outcome | 7         | 58.3% | 26         | 68.4% | 12        | 70.6% |          |                          |
| OSFED | Poor outcome | 15        | 57.7% | 14         | 42.4% | 7         | 53.8% | 0.363    | 0.142                    |
|       | Good outcome | 11        | 42.3% | 19         | 57.6% | 6         | 46.2% |          |                          |

*Note.* AN: anorexia nervosa. BN: bulimia nervosa. BED: binge eating disorder. OSFED: other specified feeding or eating disorder.

FA−: food addiction negative screening score. FA+: food addiction positive screening score.

SU−: substances use absent. SU+: substances use present.

Poor outcome: dropout or non-remission. Good outcome: partial remission or full remission.

\* Bold: significant parameter. <sup>†</sup> Bold: effect size into the range mild-moderate to large-high (|CVI| > 0.15).
